# Supplementary material for: Development and validation of a multi-lingual online questionnaire for surveying the COVID-19 prevention and control measures used in global workplaces
Source: Springer Nature journal article supplement (doi:10.1186/s12889-022-12500-w), 2022-01-12
Supplement: 12889_2022_12500_MOESM3_ESM.pdf [file 12889_2022_12500_MOESM3_ESM.pdf]

# Psychometric Evaluation Results

Carolyn Ingram

8/30/2021

## Exploratory Factor Analysis

### Factorability of the Data

Kaiser-Meyer-Olkin statistic (KMO) = 0.77

Bartlett's test of sphericity statistic  $p < 0.001$

Tests indicate the suitability of data for EFA.

Polychoric correlation matrices were tested due to the ordinal nature of data, but did not meet the KMO statistic requirement. Pearson correlations were used.

```
KMO(r=cor(efa))
```

```
## Kaiser-Meyer-Olkin factor adequacy
## Call: KMO(r = cor(efa))
## Overall MSA = 0.77
## MSA for each item =
##      Handwashing      disinfection      barriers
##      0.88             0.89             0.88
##      distancing      masking1       masking2
##      0.68             0.68             0.87
##      movement      bubbles       restrictedentry
##      0.89             0.85             0.91
##      risk      distance_maintained  mask_maintained
##      0.85             0.69             0.68
##      temperature      ventilation   env_monitoring
##      0.79             0.81             0.70
##      air_quality      test_symp    test_contacts
##      0.71             0.73             0.72
##      test_all      test_random  isolate_contact
##      0.69             0.69             0.84
##      isolate_symptoms  isolate_positive  tem_checks
##      0.76             0.74             0.77
##      symp_reporting  cost_test_combined  paidtime_test_combined
##      0.90             0.77             0.76
##      paidtime_sick_combined  ct_program  ed_signage
##      0.74             0.81             0.80
##      training_ppe      training_colleagues  training_socializeout
##      0.79             0.82             0.80
##      improve_basic  improve_access_basic  improve_access_funding
##      0.78             0.76             0.75
##      improve_adherence_basic  improve_education  improve_ct
##      0.83             0.79             0.75
##      improve_testing  improve_vaccine_access  improve_vaccine_uptake
##      0.74             0.67             0.65
##      improve_env      vaccine
##      0.82             0.72
```

```
cortest.bartlett(efa)
```

```
## R was not square, finding R from data
```

```

## $chisq
## [1] 7584.387
##
## $p.value
## [1] 0
##
## $df
## [1] 946

```

## Scree Plot and Parallel Analysis

You can also embed plots, for example:

```
fa.parallel(efa, fm="minrank", n.iter = 500)
```

```
## Loading required namespace: Rcsdp
```

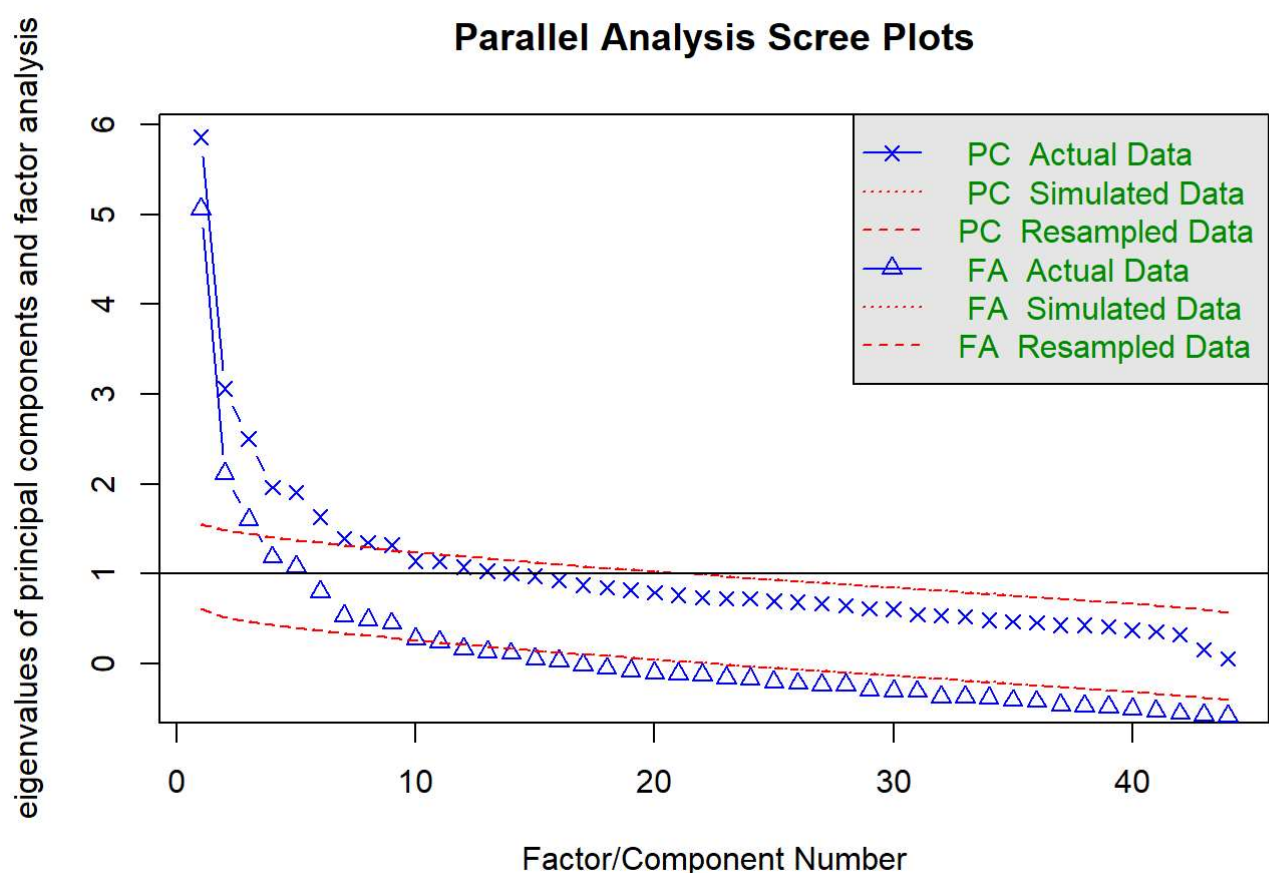

```
## Parallel analysis suggests that the number of factors = 9 and the number of components = 9
```

```

fa.nine <- fa(r=efa,
             nfactors = 9,
             covar = FALSE, SMC = TRUE,
             fm="minrank", # type of factor analysis we want to use ("minrank" is minimum rank
              factor analysis)
             max.iter=100, # (50 is the default, but we have changed it to 100)
             rotate="oblimin") # none rotation

```

```
## Loading required namespace: GPArotation
```

```
print(fa.nine)
```

```

## Factor Analysis using method = minrank
## Call: fa(r = efa, nfactors = 9, rotate = "oblimin", SMC = TRUE, covar = FALSE,
##       max.iter = 100, fm = "minrank")
## Standardized loadings (pattern matrix) based upon correlation matrix
##
##       MRFA2 MRFA4 MRFA5 MRFA3 MRFA1 MRFA8 MRFA6 MRFA7 MRFA9
## Handwashing        0.03  0.14  0.16  0.18  0.13 -0.04  0.00 -0.04 -0.05
## disinfection      -0.12  0.23  0.11  0.17  0.14  0.10  0.15 -0.05 -0.15
## barriers           0.01  0.41 -0.06  0.07  0.08  0.14  0.11 -0.09  0.09
## distancing         0.02  0.96  0.02 -0.01  0.00 -0.04  0.00  0.01  0.00
## masking1           0.01 -0.01  0.86 -0.03  0.04  0.01 -0.01  0.04 -0.01
## masking2           0.07  0.25  0.48  0.08 -0.13  0.09 -0.07 -0.05  0.17
## movement          -0.02  0.21  0.17  0.11  0.16  0.09  0.05  0.06  0.37
## bubbles           -0.07  0.23  0.00  0.15  0.14  0.15 -0.05 -0.10  0.35
## restrictedentry   -0.11  0.01  0.16  0.11  0.20  0.07  0.10 -0.04  0.25
## risk               0.04  0.21  0.11  0.01  0.05  0.06  0.12  0.09  0.26
## distance_maintained -0.02  0.93  0.00  0.01 -0.01  0.01  0.02  0.00  0.00
## mask_maintained   -0.04  0.00  0.97 -0.01 -0.02 -0.01  0.00  0.00 -0.01
## temperature       -0.09  0.02  0.07 -0.13  0.23  0.51 -0.13  0.17 -0.03
## ventilation       -0.08  0.06  0.07 -0.06  0.23  0.34 -0.13  0.00  0.15
## env_monitoring    0.07 -0.02  0.01 -0.05 -0.05  0.72  0.08  0.03  0.05
## air_quality       0.00 -0.03 -0.02  0.06 -0.04  0.78  0.00 -0.03 -0.06
## test_symp         0.05  0.00  0.08  0.08 -0.07  0.02  0.14  0.59 -0.03
## test_contacts    -0.02 -0.01  0.01  0.18 -0.09  0.05  0.04  0.71 -0.01
## test_all         -0.01 -0.18  0.00 -0.14  0.31  0.02  0.08  0.09  0.27
## test_random       0.03  0.05  0.02  0.01  0.08  0.04 -0.10  0.17  0.09
## isolate_contact  -0.10  0.01 -0.03  0.55  0.06  0.19 -0.03  0.02  0.12
## isolate_symptoms -0.05  0.05 -0.03  0.77  0.02 -0.02 -0.04  0.05  0.01
## isolate_positive  0.04 -0.03  0.00  0.78  0.00 -0.07 -0.01  0.10 -0.03
## tem_checks        0.04  0.06  0.06 -0.10  0.36  0.01 -0.14  0.47  0.06
## symp_reporting   -0.01  0.13  0.03  0.16  0.15 -0.05  0.14  0.33  0.09
## cost_test_combined 0.00 -0.01 -0.01  0.01  0.06 -0.06  0.51  0.14  0.07
## paidtime_test_combined -0.06  0.04 -0.02 -0.08  0.04  0.02  0.66  0.04  0.10
## paidtime_sick_combined -0.03  0.15 -0.09 -0.08  0.03  0.05  0.57  0.06 -0.15
## ct_program       -0.04 -0.08  0.24  0.04  0.11  0.08  0.33  0.05  0.11
## ed_signage       0.12  0.12  0.09  0.23  0.01  0.04  0.30 -0.10 -0.20
## training_ppe      0.04  0.00  0.14  0.06  0.62 -0.09  0.05  0.08 -0.23
## training_colleagues -0.02  0.10  0.01  0.10  0.65  0.06  0.09 -0.16 -0.01
## training_socializeout -0.01 -0.01 -0.07 -0.02  0.65  0.04  0.03  0.02  0.19
## improve_basic     0.54 -0.09 -0.01 -0.02 -0.03 -0.03  0.09 -0.06  0.23
## improve_access_basic 0.58 -0.11  0.04  0.02 -0.09 -0.05  0.04 -0.06  0.29
## improve_access_funding 0.41 -0.08 -0.01  0.06 -0.06  0.06  0.00  0.00  0.10
## improve_adherence_basic 0.52 -0.10 -0.05  0.06  0.05 -0.03  0.05 -0.05 -0.04
## improve_education 0.62  0.02 -0.08 -0.02  0.05 -0.06 -0.03  0.07  0.02
## improve_ct       0.68  0.11 -0.06 -0.12  0.03  0.06 -0.07  0.07 -0.20
## improve_testing   0.58  0.02  0.08  0.03 -0.01  0.10 -0.12 -0.01 -0.18
## improve_vaccine_access 0.33  0.04  0.03  0.03  0.15  0.09 -0.15 -0.03  0.11
## improve_vaccine_uptake 0.21 -0.07 -0.02  0.15  0.14 -0.03  0.01 -0.04 -0.17
## improve_env      0.39  0.01  0.11  0.05 -0.06 -0.20  0.12 -0.04  0.02
## vaccine          0.11 -0.09  0.14  0.26  0.09  0.01  0.33 -0.13 -0.30
##
##           h2      u2  com
## Handwashing        0.138 0.862 4.3
## disinfection       0.288 0.712 6.4
## barriers           0.278 0.722 1.9
## distancing         0.910 0.090 1.0
## masking1           0.760 0.240 1.0
## masking2           0.404 0.596 2.3
## movement           0.394 0.606 3.1
## bubbles            0.329 0.671 3.4
## restrictedentry    0.230 0.770 4.4
## risk               0.211 0.789 3.3
## distance_maintained 0.885 0.115 1.0
## mask_maintained    0.917 0.083 1.0
## temperature       0.485 0.515 2.1
## ventilation        0.309 0.691 2.9
## env_monitoring    0.514 0.486 1.1
## air_quality        0.568 0.432 1.0
## test_symp         0.423 0.577 1.3
## test_contacts      0.585 0.415 1.2
## test_all           0.227 0.773 3.4

```

```

## test_random           0.066 0.934 3.2
## isolate_contact      0.387 0.613 1.5
## isolate_symptoms     0.615 0.385 1.0
## isolate_positive     0.641 0.359 1.1
## tem_checks           0.422 0.578 2.3
## symp_reporting       0.296 0.704 3.0
## cost_test_combined   0.310 0.690 1.3
## paidtime_test_combined 0.456 0.544 1.1
## paidtime_sick_combined 0.388 0.612 1.5
## ct_program           0.253 0.747 2.8
## ed_signage           0.278 0.722 4.1
## training_ppe         0.500 0.500 1.5
## training_colleagues  0.534 0.466 1.3
## training_socializeout 0.488 0.512 1.2
## improve_basic        0.360 0.640 1.5
## improve_access_basic  0.453 0.547 1.7
## improve_access_funding 0.189 0.811 1.3
## improve_adherence_basic 0.304 0.696 1.2
## improve_education    0.398 0.602 1.1
## improve_ct           0.535 0.465 1.4
## improve_testing      0.394 0.606 1.4
## improve_vaccine_access 0.165 0.835 2.4
## improve_vaccine_uptake 0.117 0.883 4.1
## improve_env          0.234 0.766 2.0
## vaccine              0.361 0.639 4.2
##
##
##          MRFA2 MRFA4 MRFA5 MRFA3 MRFA1 MRFA8 MRFA6 MRFA7 MRFA9
## SS loadings          2.69  2.62  2.33  2.07  2.06  1.87  1.70  1.48  1.17
## Proportion Var       0.06  0.06  0.05  0.05  0.05  0.04  0.04  0.03  0.03
## Cumulative Var       0.06  0.12  0.17  0.22  0.27  0.31  0.35  0.38  0.41
## Proportion Explained 0.15  0.15  0.13  0.12  0.11  0.10  0.09  0.08  0.06
## Cumulative Proportion 0.15  0.30  0.42  0.54  0.65  0.76  0.85  0.94  1.00
##
## With factor correlations of
##          MRFA2 MRFA4 MRFA5 MRFA3 MRFA1 MRFA8 MRFA6 MRFA7 MRFA9
## MRFA2  1.00 -0.12 -0.02 -0.05 -0.08 -0.10 -0.02 -0.03 -0.08
## MRFA4 -0.12  1.00  0.27  0.19  0.24  0.19  0.14  0.06  0.03
## MRFA5 -0.02  0.27  1.00  0.17  0.20  0.13  0.06  0.18  0.04
## MRFA3 -0.05  0.19  0.17  1.00  0.10  0.00  0.21  0.18 -0.02
## MRFA1 -0.08  0.24  0.20  0.10  1.00  0.23  0.17  0.15  0.08
## MRFA8 -0.10  0.19  0.13  0.00  0.23  1.00 -0.02  0.13  0.13
## MRFA6 -0.02  0.14  0.06  0.21  0.17 -0.02  1.00  0.04 -0.02
## MRFA7 -0.03  0.06  0.18  0.18  0.15  0.13  0.04  1.00  0.00
## MRFA9 -0.08  0.03  0.04 -0.02  0.08  0.13 -0.02  0.00  1.00
##
## Mean item complexity = 2.2
## Test of the hypothesis that 9 factors are sufficient.
##
## The degrees of freedom for the null model are 946 and the objective function was 12.42 with Chi Square of 7584.39
## The degrees of freedom for the model are 586 and the objective function was 2.18
##
## The root mean square of the residuals (RMSR) is 0.03
## The df corrected root mean square of the residuals is 0.04
##
## The harmonic number of observations is 627 with the empirical chi square 1215.71 with prob < 2.8e-46
## The total number of observations was 627 with Likelihood Chi Square = 1317.33 with prob < 3.5e-58
##
## Tucker Lewis Index of factoring reliability = 0.82
## RMSEA index = 0.045 and the 90 % confidence intervals are 0.041 0.048
## BIC = -2457.06
## Fit based upon off diagonal values = 0.95
## Measures of factor score adequacy
##
##          MRFA2 MRFA4 MRFA5 MRFA3 MRFA1
## Correlation of (regression) scores with factors  0.94  0.99  0.98  0.93  0.92
## Multiple R square of scores with factors        0.88  0.97  0.97  0.87  0.84
## Minimum correlation of possible factor scores    0.76  0.94  0.93  0.73  0.68
##
##          MRFA8 MRFA6 MRFA7 MRFA9

```

```
## Correlation of (regression) scores with factors    0.93 0.89  0.9  0.85
## Multiple R square of scores with factors         0.86 0.79  0.8  0.73
## Minimum correlation of possible factor scores     0.73 0.57  0.6  0.46
```

## Internal Consistency Reliability

Nine domains identified through EFA-MRFA.

## Internal Consistency - Environmental Adjustments

```
env <- efa %>% dplyr::select(temperature:air_quality)
psych::alpha(env, title = "env", check.keys = TRUE)
```

```
##
## Reliability analysis  env
## Call: psych::alpha(x = env, title = "env", check.keys = TRUE)
##
## raw_alpha std.alpha G6(smc) average_r S/N ase mean sd median_r
##   0.65      0.66    0.62      0.33    2 0.023 1.5 0.51    0.35
##
## lower alpha upper      95% confidence boundaries
## 0.61 0.65 0.69
##
## Reliability if an item is dropped:
##          raw_alpha std.alpha G6(smc) average_r S/N alpha se var.r med.r
## temperature    0.53    0.56    0.48    0.30 1.3  0.033 0.0225 0.28
## ventilation     0.64    0.65    0.56    0.38 1.9  0.025 0.0037 0.35
## env_monitoring  0.60    0.61    0.51    0.34 1.5  0.027 0.0031 0.35
## air_quality     0.56    0.56    0.48    0.30 1.3  0.030 0.0156 0.34
##
## Item statistics
##          n raw.r std.r r.cor r.drop mean sd
## temperature 627 0.76 0.74 0.61 0.50 1.6 0.76
## ventilation 627 0.70 0.65 0.45 0.37 1.8 0.85
## env_monitoring 627 0.65 0.69 0.54 0.40 1.4 0.63
## air_quality 627 0.70 0.74 0.61 0.48 1.4 0.62
##
## Non missing response frequency for each item
##          1 2 3 miss
## temperature 0.60 0.23 0.17 0
## ventilation 0.49 0.23 0.28 0
## env_monitoring 0.69 0.23 0.08 0
## air_quality 0.70 0.23 0.08 0
```

## Internal Consistency - Testing and Surveillance

```
testsurv <- efa %>% dplyr::select(test_symp, test_contacts, tem_checks, symp_reporting)
psych::alpha(testsurv, title = "testsurv")
```

```
##
## Reliability analysis  testsurv
## Call: psych::alpha(x = testsurv, title = "testsurv")
##
##   raw_alpha std.alpha G6(smc) average_r S/N  ase mean  sd median_r
##      0.62      0.62   0.58      0.29 1.6 0.025  1.8 0.66   0.26
##
##  lower alpha upper      95% confidence boundaries
## 0.57 0.62 0.67
##
## Reliability if an item is dropped:
##      raw_alpha std.alpha G6(smc) average_r  S/N alpha se  var.r med.r
## test_symp      0.52     0.51   0.42     0.26 1.06  0.034 0.0008 0.27
## test_contacts  0.48     0.48   0.38     0.24 0.92  0.036 0.0026 0.26
## tem_checks     0.62     0.62   0.55     0.36 1.66  0.026 0.0216 0.28
## symp_reporting  0.58     0.57   0.51     0.31 1.35  0.030 0.0353 0.23
##
## Item statistics
##      n raw.r std.r r.cor r.drop mean  sd
## test_symp      627 0.72 0.72 0.60 0.45 1.8 0.98
## test_contacts  627 0.74 0.74 0.65 0.50 1.7 0.96
## tem_checks     627 0.61 0.61 0.37 0.30 1.8 0.95
## symp_reporting  627 0.67 0.66 0.46 0.37 2.1 0.98
##
## Non missing response frequency for each item
##      1 2 3 miss
## test_symp      0.59 0.01 0.40 0
## test_contacts  0.62 0.01 0.37 0
## tem_checks     0.59 0.04 0.37 0
## symp_reporting 0.44 0.04 0.51 0
```

## Internal Consistency - Education and Training

```
edu <- efa %>% dplyr::select(training_ppe, training_colleagues, training_socializeout)
psych::alpha(edu, title = "edu", check.keys = TRUE)
```

```

##
## Reliability analysis edu
## Call: psych::alpha(x = edu, title = "edu", check.keys = TRUE)
##
## raw_alpha std.alpha G6(smc) average_r S/N ase mean sd median_r
## 0.68 0.68 0.6 0.42 2.1 0.022 1.8 0.72 0.44
##
## lower alpha upper 95% confidence boundaries
## 0.63 0.68 0.72
##
## Reliability if an item is dropped:
## raw_alpha std.alpha G6(smc) average_r S/N alpha se var.r
## training_ppe 0.64 0.66 0.49 0.49 1.91 0.027 NA
## training_colleagues 0.47 0.49 0.32 0.32 0.95 0.040 NA
## training_socializeout 0.61 0.61 0.44 0.44 1.56 0.031 NA
## med.r
## training_ppe 0.49
## training_colleagues 0.32
## training_socializeout 0.44
##
## Item statistics
## n raw.r std.r r.cor r.drop mean sd
## training_ppe 627 0.78 0.75 0.53 0.45 2.1 1.00
## training_colleagues 627 0.83 0.82 0.69 0.56 1.8 0.99
## training_socializeout 627 0.73 0.77 0.59 0.48 1.4 0.77
##
## Non missing response frequency for each item
## 1 3 miss
## training_ppe 0.47 0.53 0
## training_colleagues 0.58 0.42 0
## training_socializeout 0.82 0.18 0

```

## Internal Consistency - Areas for Improvement

```

imp <- efa %>% dplyr::select(improve_basic:improve_vaccine_access, improve_env)
psych::alpha(imp, title = "imp", check.keys = TRUE)

```

```
##
## Reliability analysis imp
## Call: psych::alpha(x = imp, title = "imp", check.keys = TRUE)
##
## raw_alpha std.alpha G6(smc) average_r S/N ase mean sd median_r
## 0.73 0.73 0.72 0.23 2.7 0.016 1.4 0.45 0.22
##
## lower alpha upper 95% confidence boundaries
## 0.7 0.73 0.76
##
## Reliability if an item is dropped:
## raw_alpha std.alpha G6(smc) average_r S/N alpha se
## improve_basic 0.70 0.70 0.69 0.23 2.3 0.018
## improve_access_basic 0.70 0.69 0.68 0.22 2.3 0.018
## improve_access_funding 0.72 0.72 0.71 0.24 2.6 0.017
## improve_adherence_basic 0.70 0.70 0.69 0.23 2.4 0.018
## improve_education 0.69 0.69 0.68 0.22 2.2 0.019
## improve_ct 0.69 0.69 0.68 0.22 2.2 0.019
## improve_testing 0.70 0.70 0.69 0.23 2.3 0.018
## improve_vaccine_access 0.73 0.73 0.72 0.26 2.8 0.016
## improve_env 0.72 0.72 0.71 0.24 2.6 0.016
## var.r med.r
## improve_basic 0.0078 0.22
## improve_access_basic 0.0076 0.21
## improve_access_funding 0.0082 0.23
## improve_adherence_basic 0.0086 0.21
## improve_education 0.0079 0.21
## improve_ct 0.0076 0.21
## improve_testing 0.0089 0.22
## improve_vaccine_access 0.0064 0.25
## improve_env 0.0093 0.25
##
## Item statistics
## n raw.r std.r r.cor r.drop mean sd
## improve_basic 627 0.59 0.59 0.52 0.43 1.4 0.80
## improve_access_basic 627 0.60 0.62 0.56 0.47 1.3 0.73
## improve_access_funding 627 0.47 0.49 0.37 0.32 1.3 0.71
## improve_adherence_basic 627 0.60 0.58 0.50 0.43 1.5 0.89
## improve_education 627 0.65 0.64 0.58 0.50 1.5 0.85
## improve_ct 627 0.65 0.65 0.60 0.51 1.4 0.78
## improve_testing 627 0.60 0.59 0.52 0.44 1.5 0.86
## improve_vaccine_access 627 0.39 0.42 0.28 0.24 1.3 0.67
## improve_env 627 0.51 0.49 0.37 0.32 1.6 0.90
##
## Non missing response frequency for each item
## 1 3 miss
## improve_basic 0.80 0.20 0
## improve_access_basic 0.84 0.16 0
## improve_access_funding 0.85 0.15 0
## improve_adherence_basic 0.73 0.27 0
## improve_education 0.76 0.24 0
## improve_ct 0.81 0.19 0
## improve_testing 0.75 0.25 0
## improve_vaccine_access 0.87 0.13 0
## improve_env 0.71 0.29 0
```

## Internal Consistency - Physical Distancing

```
distance <- efa %>% dplyr::select(distancing, distance_maintained)
psych::alpha(distance, title = "distance", check.keys = TRUE)
```



```
##
## Reliability analysis distance
## Call: psych::alpha(x = distance, title = "distance", check.keys = TRUE)
##
## raw_alpha std.alpha G6(smc) average_r S/N ase mean sd median_r
## 0.97 0.97 0.94 0.94 30 0.0026 2.2 0.94 0.94
##
## lower alpha upper 95% confidence boundaries
## 0.96 0.97 0.97
##
## Reliability if an item is dropped:
## raw_alpha std.alpha G6(smc) average_r S/N alpha se var.r
## distancing 0.95 0.94 0.88 0.94 15 NA 0
## distance_maintained 0.92 0.94 0.88 0.94 15 NA 0
## med.r
## distancing 0.94
## distance_maintained 0.94
##
## Item statistics
## n raw.r std.r r.cor r.drop mean sd
## distancing 627 0.98 0.98 0.95 0.94 2.3 0.96
## distance_maintained 627 0.98 0.98 0.95 0.94 2.2 0.94
##
## Non missing response frequency for each item
## 1 2 3 miss
## distancing 0.35 0.00 0.65 0
## distance_maintained 0.37 0.07 0.56 0
```

## Internal Consistency - Isolation Strategies

```
isolate <- efa %>% dplyr::select(isolate_positive, isolate_symptoms, isolate_contact)
psych::alpha(isolate, title = "isolate", check.keys = TRUE)
```

```
##
## Reliability analysis isolate
## Call: psych::alpha(x = isolate, title = "isolate", check.keys = TRUE)
##
## raw_alpha std.alpha G6(smc) average_r S/N ase mean sd median_r
## 0.71 0.73 0.67 0.47 2.7 0.02 2.5 0.66 0.39
##
## lower alpha upper 95% confidence boundaries
## 0.67 0.71 0.75
##
## Reliability if an item is dropped:
## raw_alpha std.alpha G6(smc) average_r S/N alpha se var.r med.r
## isolate_positive 0.56 0.57 0.39 0.39 1.3 0.035 NA 0.39
## isolate_symptoms 0.54 0.55 0.38 0.38 1.2 0.035 NA 0.38
## isolate_contact 0.78 0.78 0.64 0.64 3.6 0.018 NA 0.64
##
## Item statistics
## n raw.r std.r r.cor r.drop mean sd
## isolate_positive 627 0.81 0.84 0.74 0.60 2.7 0.74
## isolate_symptoms 627 0.82 0.84 0.75 0.60 2.6 0.79
## isolate_contact 627 0.78 0.74 0.49 0.43 2.3 0.95
##
## Non missing response frequency for each item
## 1 2 3 miss
## isolate_positive 0.16 0.01 0.82 0
## isolate_symptoms 0.19 0.01 0.80 0
## isolate_contact 0.35 0.01 0.64 0
```

## Internal Consistency - Costs Incurred

```
financial <- efa %>% dplyr::select(paidtime_test_combined, paidtime_sick_combined, cost_test_combined)
psych::alpha(financial, title = "financial", check.keys = TRUE)
```

```
##
## Reliability analysis financial
## Call: psych::alpha(x = financial, title = "financial", check.keys = TRUE)
##
## raw_alpha std.alpha G6(smc) average_r S/N ase mean sd median_r
## 0.6 0.6 0.51 0.33 1.5 0.027 2.3 0.62 0.37
##
## lower alpha upper 95% confidence boundaries
## 0.54 0.6 0.65
##
## Reliability if an item is dropped:
## raw_alpha std.alpha G6(smc) average_r S/N alpha se
## paidtime_test_combined 0.42 0.42 0.27 0.27 0.73 0.046
## paidtime_sick_combined 0.53 0.54 0.37 0.37 1.17 0.037
## cost_test_combined 0.54 0.54 0.37 0.37 1.15 0.037
## var.r med.r
## paidtime_test_combined NA 0.27
## paidtime_sick_combined NA 0.37
## cost_test_combined NA 0.37
##
## Item statistics
## n raw.r std.r r.cor r.drop mean sd
## paidtime_test_combined 627 0.79 0.78 0.6 0.46 2.1 0.88
## paidtime_sick_combined 627 0.76 0.73 0.5 0.39 2.2 0.89
## cost_test_combined 627 0.69 0.73 0.5 0.38 2.6 0.72
##
## Non missing response frequency for each item
## 1 2 3 miss
## paidtime_test_combined 0.32 0.21 0.47 0
## paidtime_sick_combined 0.33 0.19 0.48 0
## cost_test_combined 0.13 0.17 0.70 0
```

## Internal Consistency - Number of Contacts

```
movement <- efa %>% dplyr::select(movement, bubbles, restrictedentry, risk)
psych::alpha(movement, title = "movement", check.keys = TRUE)
```

```
##
## Reliability analysis movement
## Call: psych::alpha(x = movement, title = "movement", check.keys = TRUE)
##
## raw_alpha std.alpha G6(smc) average_r S/N ase mean sd median_r
## 0.6 0.6 0.54 0.27 1.5 0.026 1.6 0.61 0.27
##
## lower alpha upper 95% confidence boundaries
## 0.55 0.6 0.65
##
## Reliability if an item is dropped:
## raw_alpha std.alpha G6(smc) average_r S/N alpha se var.r
## movement 0.44 0.45 0.36 0.22 0.82 0.038 0.0012
## bubbles 0.51 0.51 0.42 0.26 1.05 0.033 0.0044
## restrictedentry 0.58 0.58 0.48 0.31 1.36 0.028 0.0058
## risk 0.57 0.57 0.48 0.31 1.32 0.030 0.0088
##
## med.r
## movement 0.21
## bubbles 0.29
## restrictedentry 0.29
## risk 0.31
##
## Item statistics
## n raw.r std.r r.cor r.drop mean sd
## movement 627 0.75 0.74 0.62 0.48 1.7 0.94
## bubbles 627 0.69 0.69 0.53 0.40 1.6 0.91
## restrictedentry 627 0.66 0.63 0.41 0.32 1.9 1.00
## risk 627 0.59 0.64 0.42 0.33 1.3 0.75
##
## Non missing response frequency for each item
## 1 3 miss
## movement 0.67 0.33 0
## bubbles 0.70 0.30 0
## restrictedentry 0.54 0.46 0
## risk 0.83 0.17 0
```

## Internal Consistency - Masking

```
masking <- efa %>% dplyr::select(masking1,mask_maintained)
psych::alpha(masking, title = "masking", check.keys = TRUE)
```

```
##
## Reliability analysis masking
## Call: psych::alpha(x = masking, title = "masking", check.keys = TRUE)
##
## raw_alpha std.alpha G6(smc) average_r S/N ase mean sd median_r
## 0.9 0.9 0.82 0.82 9.1 0.0079 2.5 0.81 0.82
##
## lower alpha upper 95% confidence boundaries
## 0.89 0.9 0.92
##
## Reliability if an item is dropped:
## raw_alpha std.alpha G6(smc) average_r S/N alpha se var.r med.r
## masking1 0.83 0.82 0.67 0.82 4.6 NA 0 0.82
## mask_maintained 0.81 0.82 0.67 0.82 4.6 NA 0 0.82
##
## Item statistics
## n raw.r std.r r.cor r.drop mean sd
## masking1 627 0.95 0.95 0.86 0.82 2.5 0.86
## mask_maintained 627 0.95 0.95 0.86 0.82 2.5 0.85
##
## Non missing response frequency for each item
## 1 2 3 miss
## masking1 0.24 0.00 0.76 0
## mask_maintained 0.23 0.04 0.72 0
```

# Criterion Validity

## Concurrent Validity

Testing the hypothesis that overall protective scores/40 are significantly associated with the 'gold standard' question: Do you feel protected from COVID-19 at work? Group 1 = No or Unsure, Group 2 = Yes

Heterogeneity of variances verified- Bartlett test ( $p=0.55$ )

Normality verified -Shapiro-Wilks statistic ( $p < 0.001$ )

Two-sample t-test shows that protective scores are significantly associated with the gold standard question 'Do you feel protected from COVID-19 at work?' ( $p < 0.001$ )

```
var.test(total ~ protected, data = all_protected)
```

```
##
## F test to compare two variances
##
## data: total by protected
## F = 1.0737, num df = 231, denom df = 350, p-value = 0.5473
## alternative hypothesis: true ratio of variances is not equal to 1
## 95 percent confidence interval:
## 0.8508462 1.3626183
## sample estimates:
## ratio of variances
## 1.073652
```

```
shapiro.test(all_protected$total)
```

```
##
## Shapiro-Wilk normality test
##
## data: all_protected$total
## W = 0.98954, p-value = 0.0003627
```

```
t.test(total ~ protected, data = all_protected)
```

```
##
## Welch Two Sample t-test
##
## data: total by protected
## t = -3.9007, df = 482.32, p-value = 0.0001095
## alternative hypothesis: true difference in means is not equal to 0
## 95 percent confidence interval:
## -1.988956 -0.656417
## sample estimates:
## mean in group 1 mean in group 2
## 19.74569 21.06838
```

## Construct Validity

### Known Groups Technique

Total protective scores vary significantly between Canada and Ireland, the two largest participant groups ( $p = 0.04$ )

```
all_countries <- subset(all, all$country == "Canada" | all$country == "Ireland" )
table(all_countries$country)
```

```
##
## Canada Ireland
## 243 210
```

```
t.test(total ~ country, data = all_countries)
```

```
##  
## Welch Two Sample t-test  
##  
## data: total by country  
## t = 1.9674, df = 423.68, p-value = 0.04979  
## alternative hypothesis: true difference in means is not equal to 0  
## 95 percent confidence interval:  
## 0.000707231 1.542620223  
## sample estimates:  
## mean in group Canada mean in group Ireland  
## 21.02881 20.25714
```

Whether or not a worker feels protected from COVID-19 at work varies significantly by country ( $p=0.03$ )

(Countries with greater than 15 respondents included)

```
all_countries <- subset(all, all$country == "Argentina" | all$country == "Canada" | all$country == "China" | all$country == "Ireland" | all$country == "Nigeria" | all$country == "Poland" | all$country == "United Kingdom of Great Britain and Northern Ireland")  
  
table(all_countries$country, all_countries$protected)
```

```
##  
##  
## Argentina 5 16  
## Canada 106 134  
## China 5 17  
## Ireland 72 114  
## Nigeria 6 11  
## Poland 6 10  
## United Kingdom of Great Britain and Northern Ireland 27 17
```

```
chisq.test(all_countries$country, all_countries$protected)
```

```
##  
## Pearson's Chi-squared test  
##  
## data: all_countries$country and all_countries$protected  
## X-squared = 14.717, df = 6, p-value = 0.02257
```

Whether or not a worker feels protected from COVID-19 at work varies significantly by sector ( $p < 0.001$ )

(Sectors with greater than 20 respondents included)

```
all_sectors <- subset(all, all$industry == "Administration" | all$industry == "Construction" | all$industry == "Educational services" | all$industry == "Health care or social assistance" | all$industry == "Professional, scientific or technical services" | all$industry == "Retail trade" | all$industry == "Manufacturing and food processing" | all$industry == "Public administration and defence" | all$industry == "Transportation or warehousing")  
  
table(all_sectors$industry, all_sectors$protected)
```

```
##  
##  
## Administration 9 10  
## Construction 5 10  
## Educational services 51 42  
## Health care or social assistance 87 148  
## Manufacturing and food processing 1 13  
## Public administration and defence 10 14  
## Retail trade 18 7  
## Transportation or warehousing 9 7
```

```
chisq.test(all_sectors$industry, all_sectors$protected)
```

```
##  
## Pearson's Chi-squared test  
##  
## data: all_sectors$industry and all_sectors$protected  
## X-squared = 26.537, df = 7, p-value = 0.0004037
```

The health care and social assistance sectors have more protective measures in place than other occupational sectors ( $p < 0.001$ )

```
all$healthcare_not <- 0  
all$healthcare_not[all$industry == "Health care or social assistance"] <- 1  
  
var.test(total ~ healthcare_not, data = all)
```

```
##  
## F test to compare two variances  
##  
## data: total by healthcare_not  
## F = 0.90244, num df = 371, denom df = 254, p-value = 0.3679  
## alternative hypothesis: true ratio of variances is not equal to 1  
## 95 percent confidence interval:  
## 0.7180225 1.1287293  
## sample estimates:  
## ratio of variances  
## 0.9024378
```

```
shapiro.test(all$total)
```

```
##  
## Shapiro-Wilk normality test  
##  
## data: all$total  
## W = 0.9906, p-value = 0.0004994
```

```
t.test(total ~ healthcare_not, data = all)
```

```
##  
## Welch Two Sample t-test  
##  
## data: total by healthcare_not  
## t = -5.6044, df = 527.3, p-value = 3.373e-08  
## alternative hypothesis: true difference in means is not equal to 0  
## 95 percent confidence interval:  
## -2.511200 -1.207649  
## sample estimates:  
## mean in group 0 mean in group 1  
## 19.45430 21.31373
```

## Discriminant validity

No linear correlation between (1) total protective score and (2) improvement score ( $r=-0.05$ )

```
summary(all$score_improve)
```

```
## Min. 1st Qu. Median Mean 3rd Qu. Max.  
## 0.000 0.000 2.000 2.096 3.000 10.000
```

```
corr.test(all$total, all$score_improve)
```

```
## Call:corr.test(x = all$total, y = all$score_improve)
## Correlation matrix
## [1] -0.05
## Sample Size
## [1] 627
## These are the unadjusted probability values.
## The probability values adjusted for multiple tests are in the p.adj object.
## [1] 0.2
##
## To see confidence intervals of the correlations, print with the short=FALSE option
```

Significant negative linear correlation between (1) the number of measures workers would like to see improved and (2) feeling protected from COVID at work ( $r=-0.38$ )

```
corr.test(all$score_improve,all$protected)
```

```
## Call:corr.test(x = all$score_improve, y = all$protected)
## Correlation matrix
## [1] -0.38
## Sample Size
## [1] 583
## These are the unadjusted probability values.
## The probability values adjusted for multiple tests are in the p.adj object.
## [1] 0
##
## To see confidence intervals of the correlations, print with the short=FALSE option
```

Significant correlation between (1) the total scores quartile and (2)

```
all$totalquart <- quantcut(all$total, q=4)
table(all$totalquart, all$protected)
```

```
##
##           1  2
## [9,17]   71  57
## (17,20]  69 103
## (20,23]  49  99
## (23,36]  43  92
```

```
chisq.test(all$totalquart, all$protected)
```

```
##
## Pearson's Chi-squared test
##
## data: all$totalquart and all$protected
## X-squared = 19.45, df = 3, p-value = 0.0002207
```

```
all$protected <- as.factor(all$protected)
logit <- glm(protected ~ totalquart, all, family = binomial)
logistic.display(logit, alpha=.05)
```

```
##
## Logistic regression predicting protected : 2 vs 1
##
##              OR(95%CI)          P(Wald's test) P(LR-test)
## totalquart: ref.=[9,17]                < 0.001
## (17,20]          1.86 (1.17,2.95)  0.009
## (20,23]          2.52 (1.54,4.1)   < 0.001
## (23,36]          2.67 (1.61,4.41)  < 0.001
##
## Log-likelihood = -382.2416
## No. of observations = 583
## AIC value = 772.4832
```

```

all$protected2 <- NA
all$protected2[all$protected == 2] <- 0
all$protected2[all$protected == 1] <- 1
all$protected2 <- as.factor(all$protected2)

all$totalquart = relevel(all$totalquart, ref=4)
logit2 <- glm(protected ~ totalquart, all, family = binomial)
logistic.display(logit2, alpha=.05)

```

```

##
## Logistic regression predicting protected : 2 vs 1
##
##
##          OR(95%CI)          P(Wald's test) P(LR-test)
## totalquart: ref.=(23,36]          < 0.001
##   [9,17]          0.38 (0.23,0.62) < 0.001
##   (17,20]         0.7 (0.43,1.12)  0.136
##   (20,23]         0.94 (0.57,1.55) 0.822
##
## Log-likelihood = -382.2416
## No. of observations = 583
## AIC value = 772.4832

```

```

logit3 <- glm(protected ~ gender, all, family = binomial)
logistic.display(logit3, alpha=.05)

```

```

##
## Logistic regression predicting protected : 2 vs 1
##
##
##          OR(95%CI)          P(Wald's test) P(LR-test)
## gender: ref.=Female          < 0.001
##   Male          1.99 (1.35,2.94) < 0.001
##   Non-binary / third gender 608349.25 (0,Inf) 0.98
##   Prefer not to say      0.13 (0.02,1.09) 0.06
##
## Log-likelihood = -380.4509
## No. of observations = 581
## AIC value = 768.9019

```

```

logit4 <- glm(protected ~ education, all, family = binomial)
logistic.display(logit4, alpha=.05)

```

```

##
## Logistic regression predicting protected : 2 vs 1
##
##
##          OR(95%CI)          P(Wald's test)
## education: ref.=College degree or higher
##   Prefer not to say          0.48 (0.13,1.71) 0.257
##   Secondary school diploma    0.84 (0.49,1.44) 0.534
##   Some secondary school education 1.64 (0.66,4.05) 0.288
##   Vocational training         5.44 (2.1,14.08) < 0.001
##
##          P(LR-test)
## education: ref.=College degree or higher < 0.001
##   Prefer not to say
##   Secondary school diploma
##   Some secondary school education
##   Vocational training
##
## Log-likelihood = -381.3728
## No. of observations = 583
## AIC value = 772.7456

```
